# Supplementary material for: Interfacial chalcogen pair-mediated, biaxial strain- and interlayer distance-tuneable type-2 band alignment in an SnSSe homogeneous bilayer: a density functional theory-based analysis
Source: Royal Society of Chemistry journal article supplement (doi:10.1039/d5nr00552c), 2025-01-01
Supplement: d5nr00552c1.pdf [file d5nr00552c1.pdf]

## Supplementary Information

### Interfacial Chalcogen Pair Mediated and Biaxial Strain Tuneable Type-2 Band Alignment in SnSSe Homogenous Bilayer- A Density Functional Theory-Based Analysis

Naresh Bahadursha<sup>a</sup>, Chanda Bhavitha Sri<sup>a</sup>, Kuna Krishna Ruthvik<sup>a</sup>, Swastik Bhattacharya<sup>b</sup>, and Sayan Kanungo<sup>\*a,c</sup>

<sup>\*</sup>Corresponding author: E-mail: [sayan.kanungo@hyderabad.bits-pilani.ac.in](mailto:sayan.kanungo@hyderabad.bits-pilani.ac.in)

<sup>a</sup>Electrical and Electronics Engineering Department, Birla Institute of Technology and Science-Pilani, Hyderabad Campus, Hyderabad-500078, India.

<sup>b</sup>Department of Physics, Birla Institute of Technology and Science-Pilani, Hyderabad Campus, Hyderabad, 500078, India

<sup>c</sup>Materials Center for Sustainable Energy & Environment, Birla Institute of Technology and Science-Pilani, Hyderabad Campus

#### Structural and Electronic Properties of SnS<sub>2</sub>, SnSe<sub>2</sub> and SnSSe Monolayer

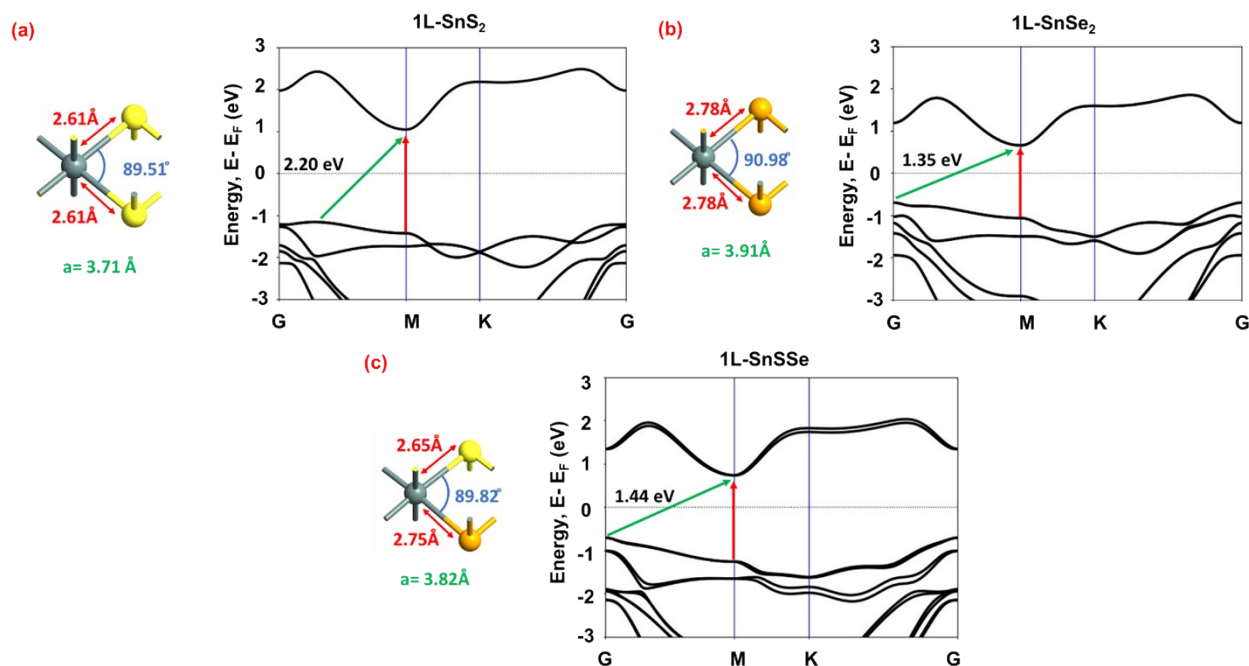

**Figure S1.** Structural and Electronic Properties of monolayers of (a) SnS<sub>2</sub> (b) SnSe<sub>2</sub> (c) SnSSe.

## Influence of Interlayer Chalcogen Pairing on Atomic Orbital Projected Density of States (PDOS) of SnSSe Bilayers

(a)

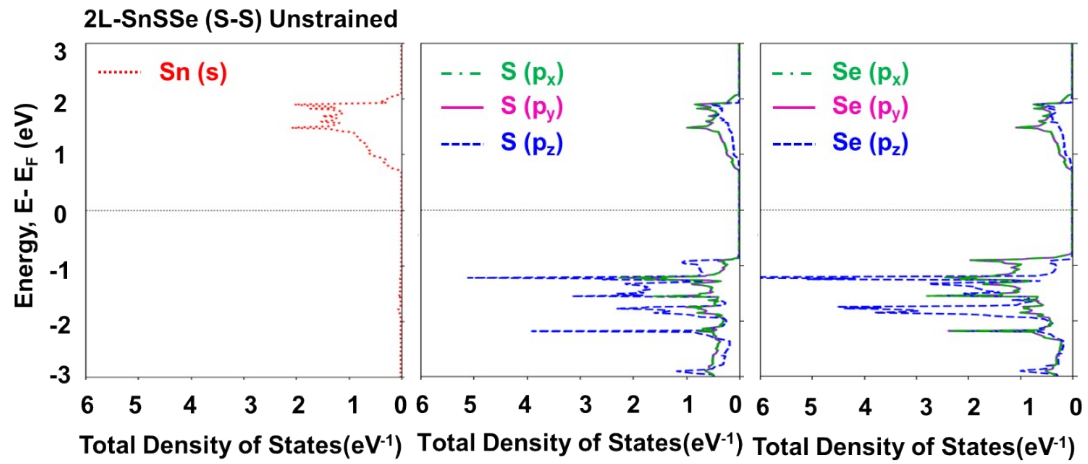

(b)

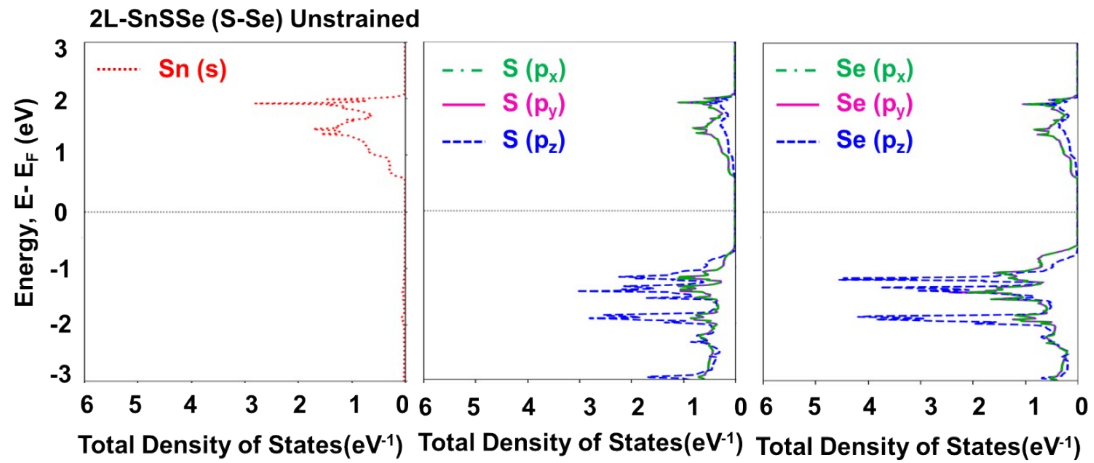

(c)

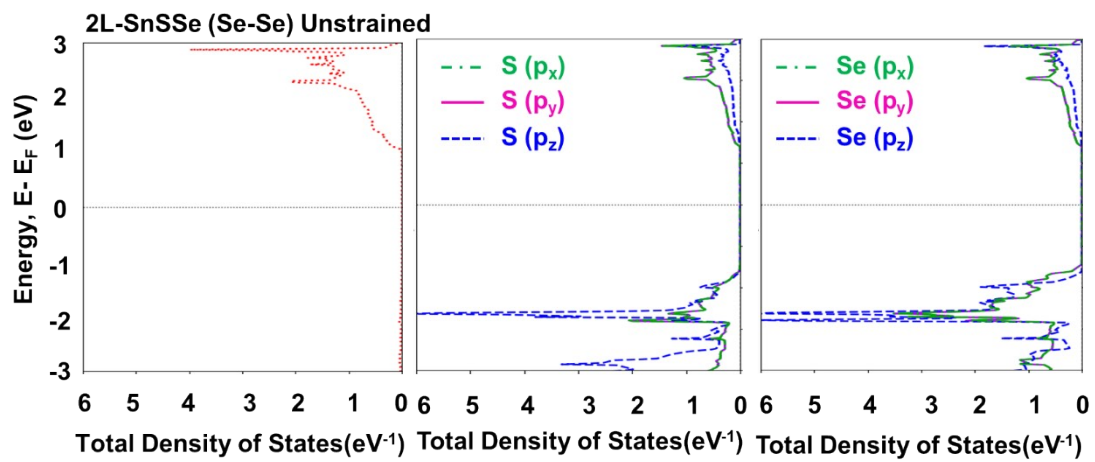

**Figure S2.** Individual atomic orbital projections on Projected density for SnSSe bilayers of (a) S-S (b) S-Se and (c) Se-Se chalcogen pair configurations.

# Influence of Interlayer Distance Variations on Spatial Distribution of Bloch States, Total and Atomic Orbital Projected Density of States (PDOS) of SnSSe Bilayer in S-Se Configuration

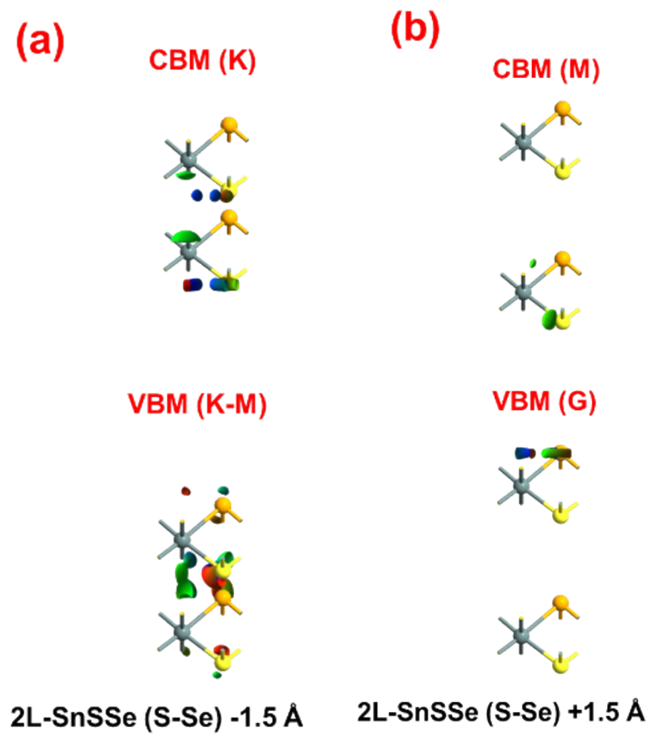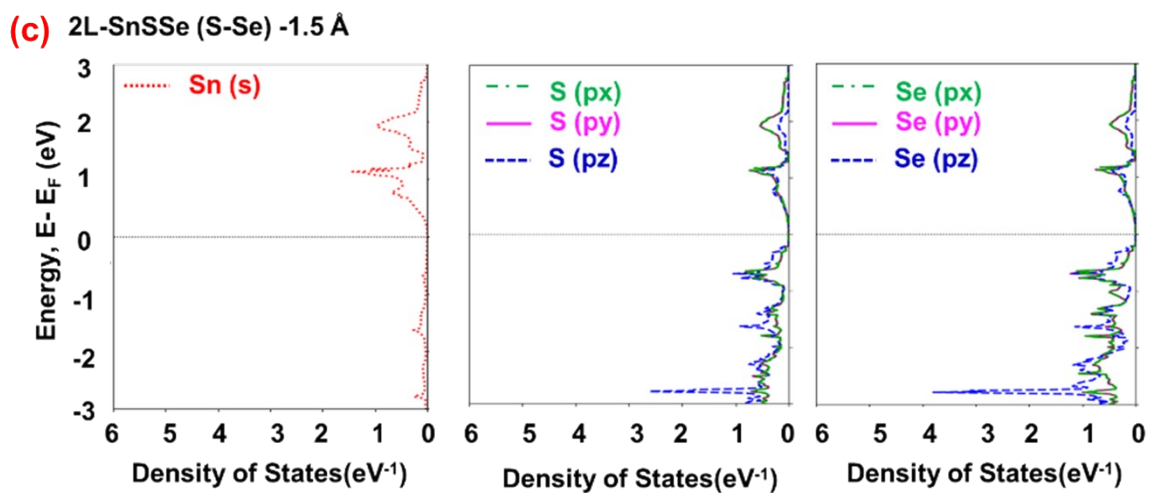

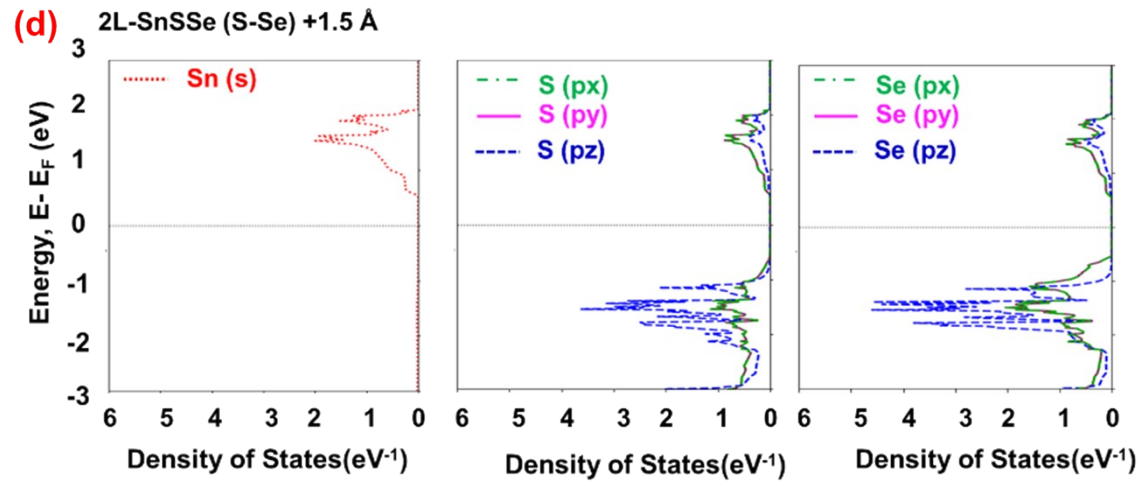

**Figure S3.** Plots of Bloch states for: (a) -1.5 Å and (b) 1.5 Å interlayer distance variations, plots of atomic orbital projected density of states for: (c) -1.5 Å (d) 1.5 Å interlayer distance variations in S-Se configuration of SnSSe bilayer.

## Influence of Biaxial Strain on Structural Properties of SnSSe Bilayers in S-Se Interlayer Chalcogen Pair Configurations

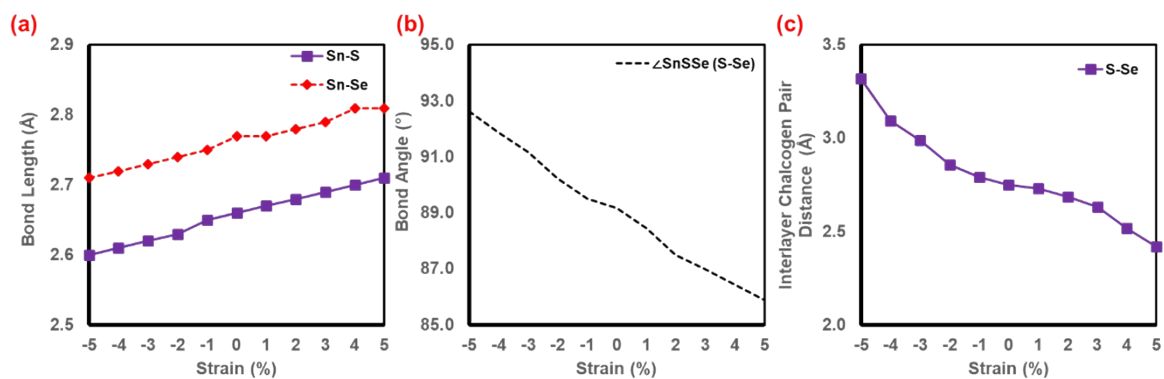

**Figure S4.** Plots of (a) bond length, (b) bond angle and (c) interlayer chalcogen pair distance as a function of strain for bilayer SnSSe in S-Se configuration.

# Influence of Biaxial Strain on Band structures and Atomic Orbital Projected Density of States of SnSSe Bilayers in S-Se Interlayer Chalcogen Pair Configurations

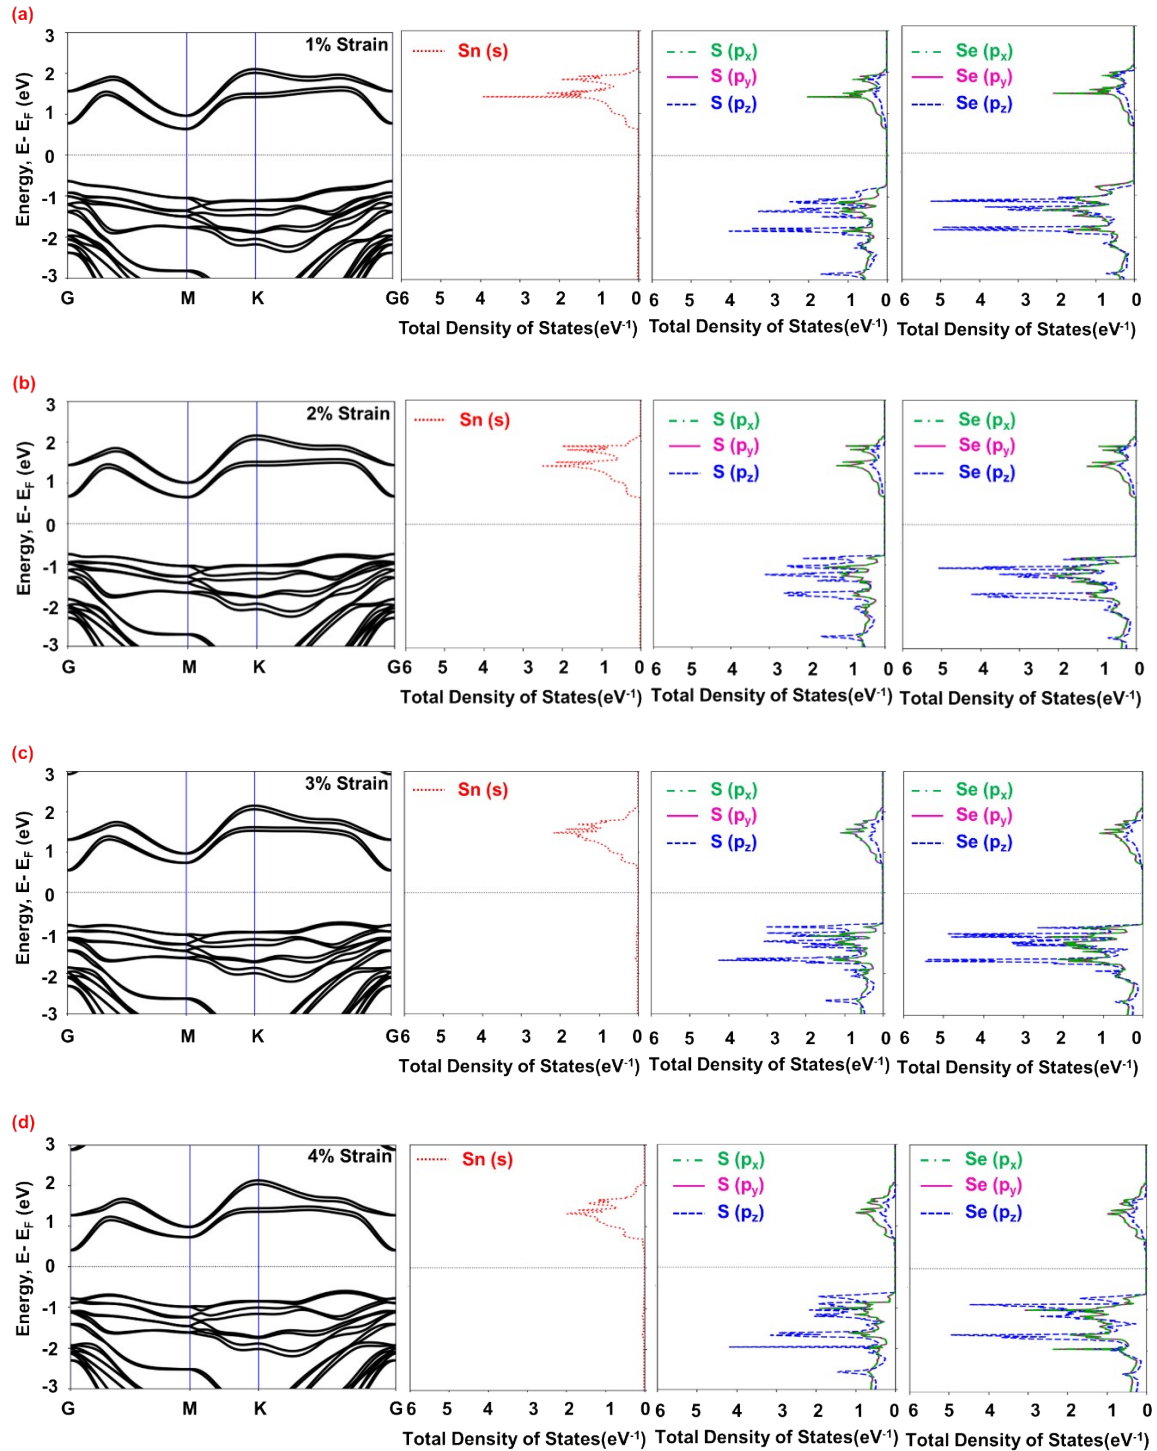

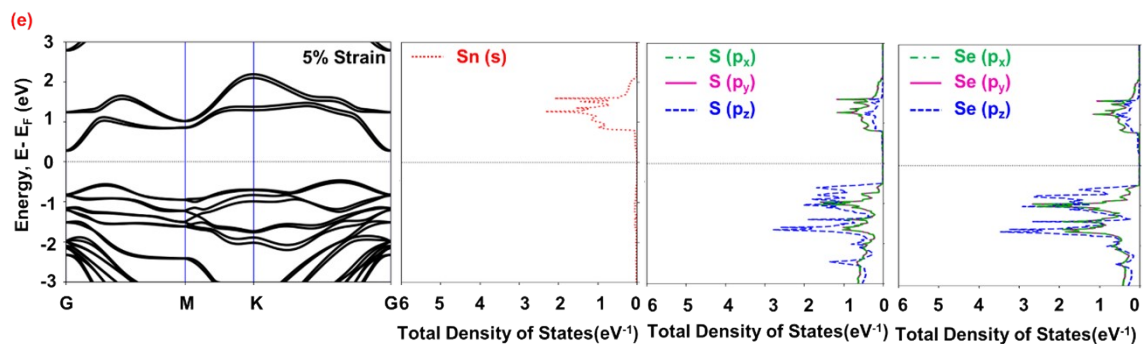

**Figure S5.** Plots of band structures and individual atomic projected density of states as a function of (a) 1%, (b) 2%, (c) 3%, (d) 4%, and (e) 5% BC strains for bilayer SnSSe of S-Se configurations.

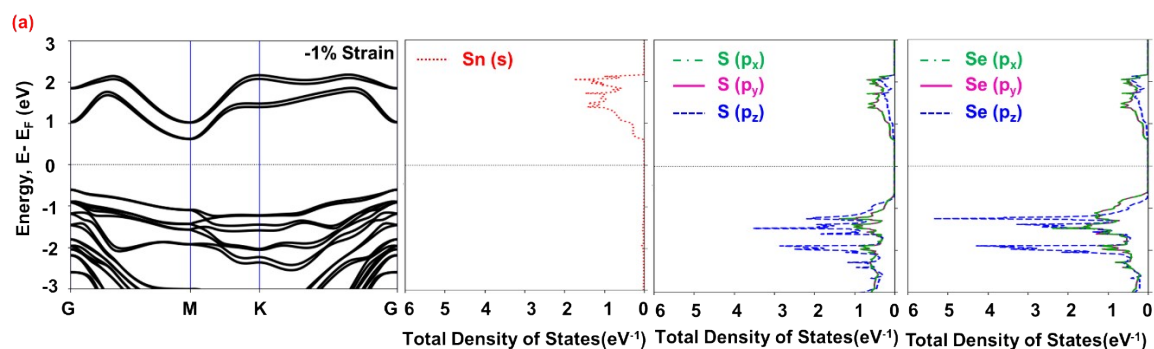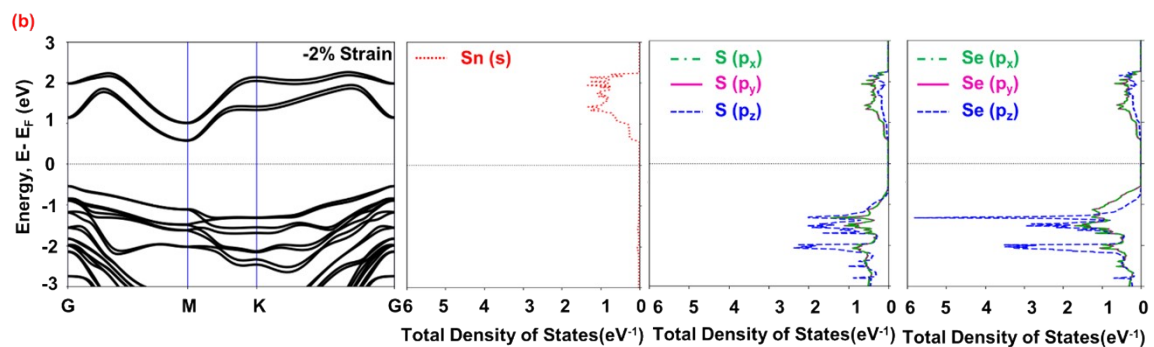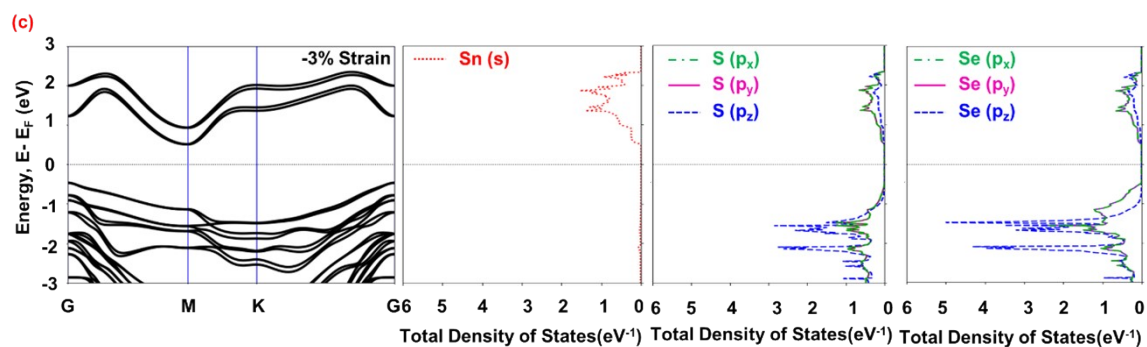

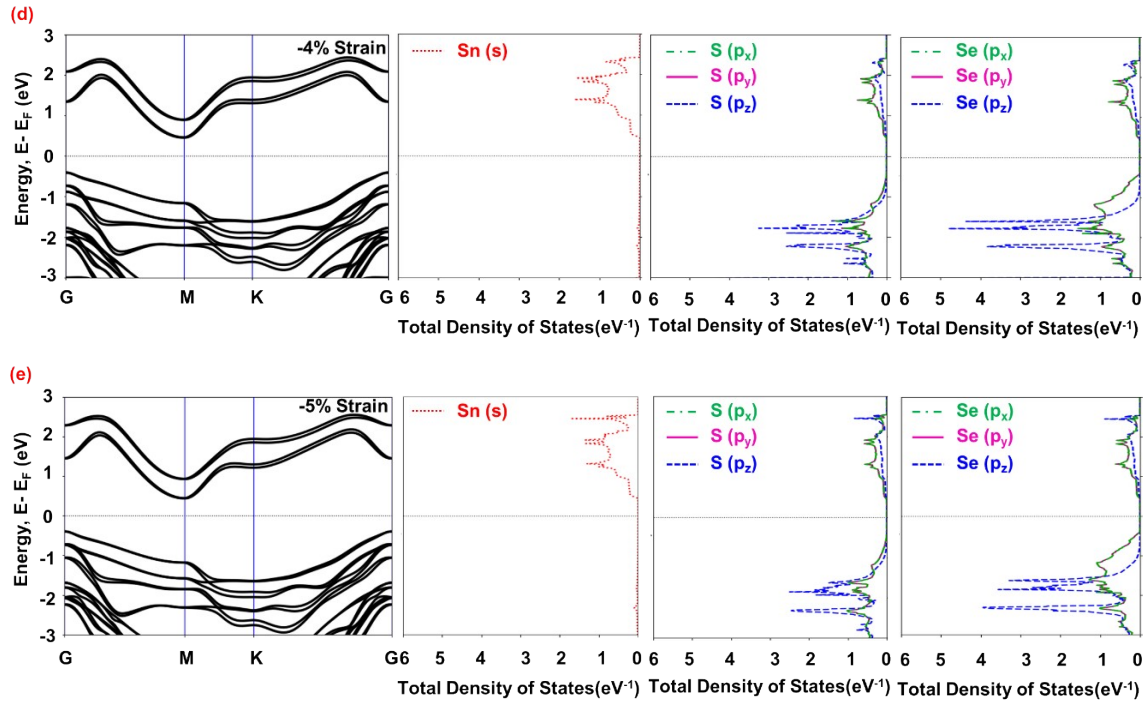

**Figure S6.** Plots of band structures and individual atomic projected density of states as a function of (a) -1%, (b) -2%, (c) -3%, (d) -4%, and (e) -5% BT strains for bilayer SnSSe of S-Se configurations.

## Influence of Biaxial Strain and Interlayer Distances on Conduction Band Spread in Energy for SnSSe Bilayers in S-Se Interlayer Chalcogen Pair Configurations

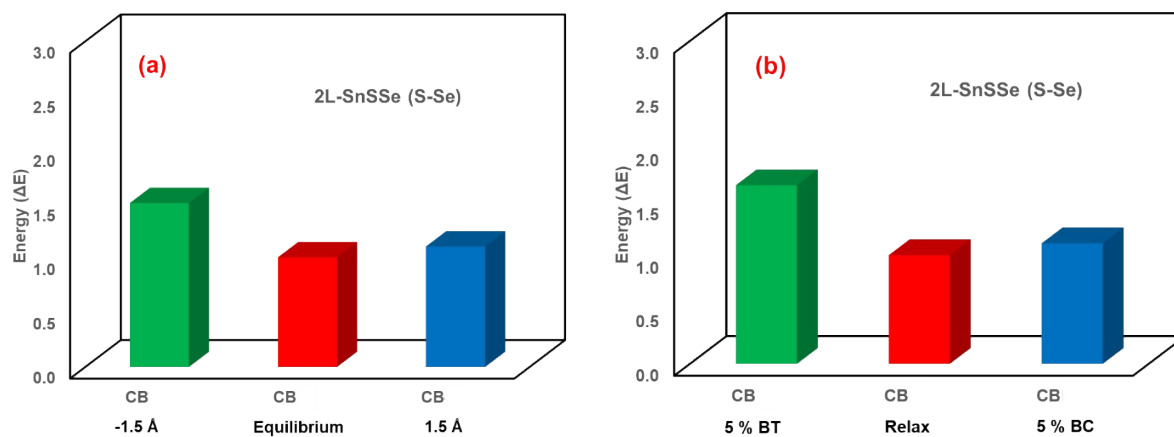

**Figure S7.** Plots of conduction band spread over energy for (a) different interlayer distance, and (b) different biaxial strain.
